# Supplementary material
Source: PubMed Central journal article supplement (PMC4479157)
Supplement: NIHMS670834-supplement-Text_and_Figures.pdf [file NIHMS670834-supplement-Text_and_Figures.pdf]

# ADVANCED FUNCTIONAL MATERIALS

## Supporting Information

for *Adv. Funct. Mater.*, DOI: 10.1002/adfm.201400274

### Digital Plasmonic Patterning for Localized Tuning of Hydrogel Stiffness

*Kolin C. Hribar, Yu Suk Choi, Matthew Ondeck, Adam J.  
Engler, and Shaochen Chen\**

## Supporting Information

### Digital Plasmonic Patterning for Localized Tuning of Hydrogel Stiffness

*Kolin C. Hribar, Yu Suk Choi, Matthew Ondeck, Adam J. Engler, Shaochen Chen\**

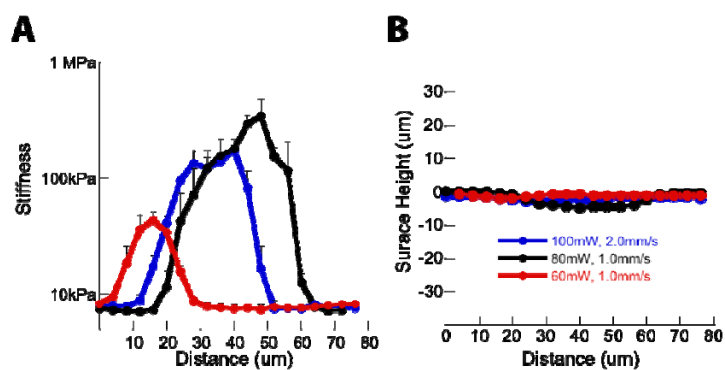

**Figure S1.** AFM results for 7 kPa gels. a) Mechanical changes and b) surface height changes according to various laser intensities and writing speeds.
